# Supplementary material
Source: publisher figshare collection journal article supplement (https://tandf.figshare.com/articles/dataset/_/25661828)
Supplement: Supplementary file 1 [file 1]

**Table S1.** Sample sizes and collecting information of 10 Bombycoidea species analysed in this study.

| <b>FAMILY: Subfamily<br/>Species</b> | <b><i>n</i></b> | <b>Source</b>      | <b>Reared/<br/>Wild-caught</b> | <b>Testing Site</b> | <b>Plant Fed</b>                   | <b>Voucher Location</b> | <b>Voucher Number(s)</b>                      |
|--------------------------------------|-----------------|--------------------|--------------------------------|---------------------|------------------------------------|-------------------------|-----------------------------------------------|
| <b>SATURNIIDAE: Ceratocampinae</b>   |                 |                    |                                |                     |                                    |                         |                                               |
| <i>Citheronia bellavista</i>         | 5               | WWB                | Reared                         | Lab                 | <i>Prunus</i> sp., <i>Rhus</i> sp. | Carleton U.             | n/a                                           |
| <i>Citheronia lobesis</i>            | 2               | Costa Rica         | Wild-caught                    | Field               | <i>Cochlospermum vitifolium</i>    | Carleton U.             | n/a                                           |
| <i>Citheronia sepulcralis</i>        | 5               | Florida            | Reared                         | Lab                 | <i>Pinus</i> sp.                   | Carleton U.             | n/a                                           |
| <b>SPHINGIDAE: Macroglossinae</b>    |                 |                    |                                |                     |                                    |                         |                                               |
| <i>Aellopos titan</i>                | 2               | Costa Rica         | Wild-caught                    | Field               | <i>Randia thurberi</i>             | n/a                     | 18-SRNP-55443;<br>18-SRNP-55444               |
| <i>Amphion floridensis</i>           | 5               | Florida            | Reared                         | Lab                 | <i>Vitis</i> sp.                   | Carleton U.             | n/a                                           |
| <i>Erinnyis ello</i>                 | 3               | Costa Rica         | Wild-caught                    | Field               | <i>Carica papaya</i>               | n/a                     | 18-SRNP-988;<br>18-SRNP-987;<br>18-SRNP-55445 |
| <i>Nyceryx magna</i>                 | 1               | Costa Rica         | Wild-caught                    | Field               | <i>Pentagonia donnell-smithii</i>  | Carleton U.             | 09-SRNP-2633<br>09-SRNP-2635;                 |
| <i>Pachygonidia drucei</i>           | 3               | Costa Rica         | Wild-caught                    | Field               | <i>Doliocarpus multiflorus</i>     | n/a                     | 18-SRNP-31151;<br>18-SRNP-31152               |
| <i>Sphecodina abbottii</i>           | 5               | Ottawa,<br>Florida | Reared                         | Lab                 | <i>Vitis</i> sp.                   | Carleton U.             | n/a                                           |
| <b>BRAHMAEIDAE</b>                   |                 |                    |                                |                     |                                    |                         |                                               |
| <i>Brahmaea tancrei</i>              | 2               | WWB                | Reared                         | Lab                 | <i>Ligustrum</i> sp.               | Carleton U.             | n/a                                           |
